# Supplementary material for: A sulfonate ligand-defected Zr-based metal–organic framework for the enhanced selective removal of anionic dyes
Source: Royal Society of Chemistry journal article supplement (doi:10.1039/d4ra02803a), 2024-01-01
Supplement: d4ra02803a1.pdf [file d4ra02803a1.pdf]

## Supplementary Materials

# A Sulfonate Ligand-Defected Zr-Based Metal-Organic Framework for The Enhanced Selective Removal of Anionic Dyes

Ha V. Le,<sup>a,b</sup> Nhi T. Vo,<sup>a,b</sup> Hoan T. Hoan,<sup>a,b</sup> Thu M. Dao,<sup>a,b</sup> Bao G. Nguyen,<sup>a,b</sup> Tung T. Nguyen,<sup>a,b</sup> Phuoc H. Ho,<sup>c</sup> Khoa D. Nguyen<sup>a,b\*</sup>

<sup>a</sup> Faculty of Chemical Engineering, Ho Chi Minh City University of Technology (HCMUT), 268 Ly Thuong Kiet Street, District 10, Ho Chi Minh City, 70000 Vietnam.

<sup>b</sup> Vietnam National University Ho Chi Minh City, Linh Trung Ward, Ho Chi Minh City, 70000 Vietnam.

<sup>c</sup> Chemical Engineering, Competence Centre for Catalysis, Chalmers University of Technology, Gothenburg, SE-412 96, Sweden.

### Corresponding Authors

\* E-mail: [khoand1989@hcmut.edu.vn](mailto:khoand1989@hcmut.edu.vn) (Khoa D. Nguyen)

**Table S1.** Basic information on employed organic dyes

| Commercial name                  | Chemical structure                                                                   | Absorption<br>( $\lambda_{\max}$ _nm) |
|----------------------------------|--------------------------------------------------------------------------------------|---------------------------------------|
| <b>Quinoline Yellow<br/>(QY)</b> | 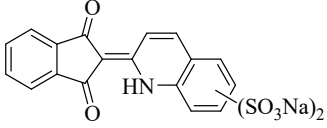   | <b>440</b>                            |
| <b>Sunset Yellow (SY)</b>        |    | <b>482</b>                            |
| <b>Rhodamine B (RhB)</b>         |    | <b>555</b>                            |
| <b>Malachite Green<br/>(MG)</b>  |  | <b>620</b>                            |

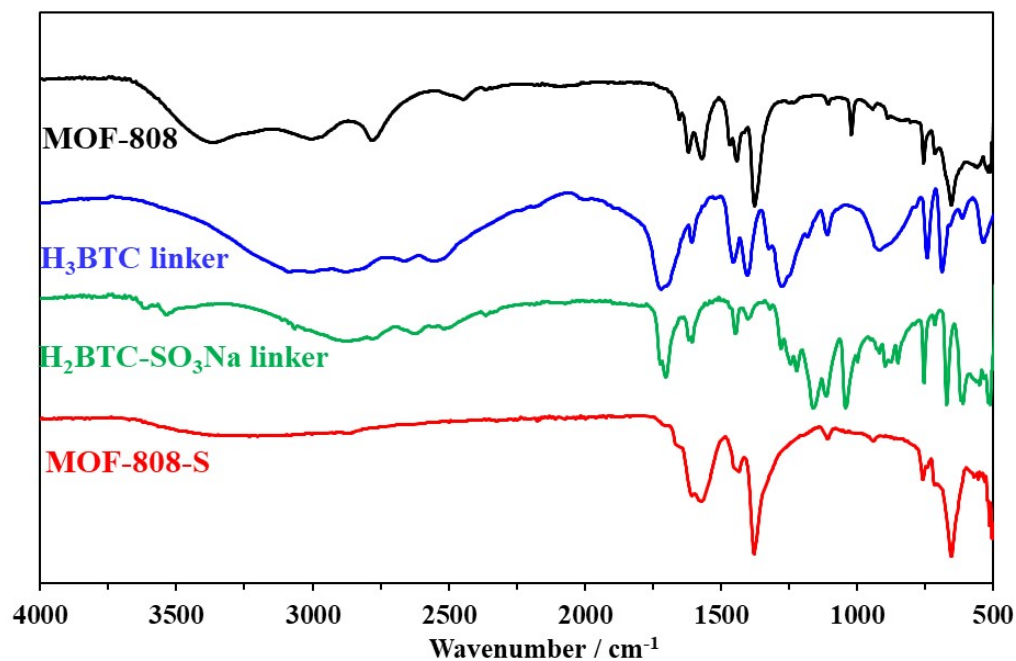

**Figure S1.** FT-IR spectra of pristine MOF-808, H<sub>3</sub>BTC linker, H<sub>2</sub>BTC-SO<sub>3</sub>Na linker, and MOF-808-S.

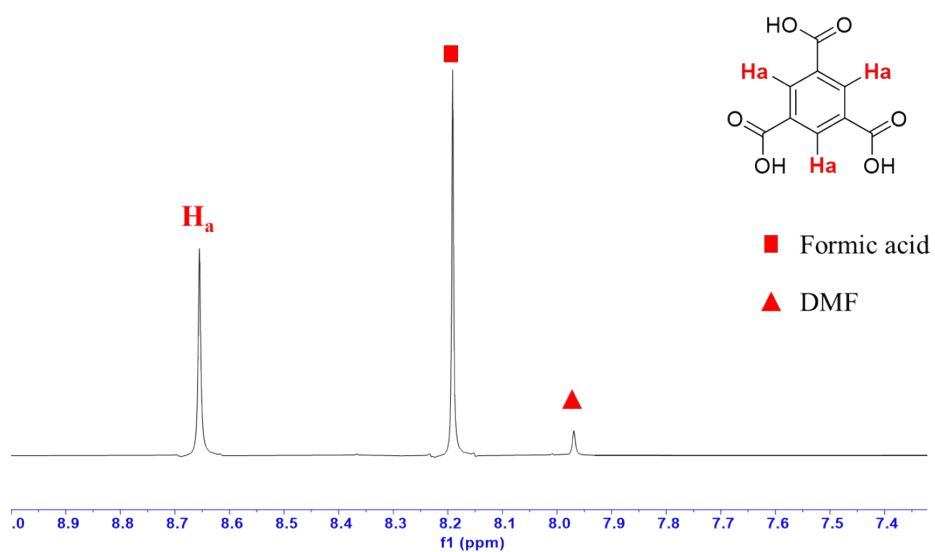

**Figure S2.** <sup>1</sup>H-NMR spectra of digested MOF-808.

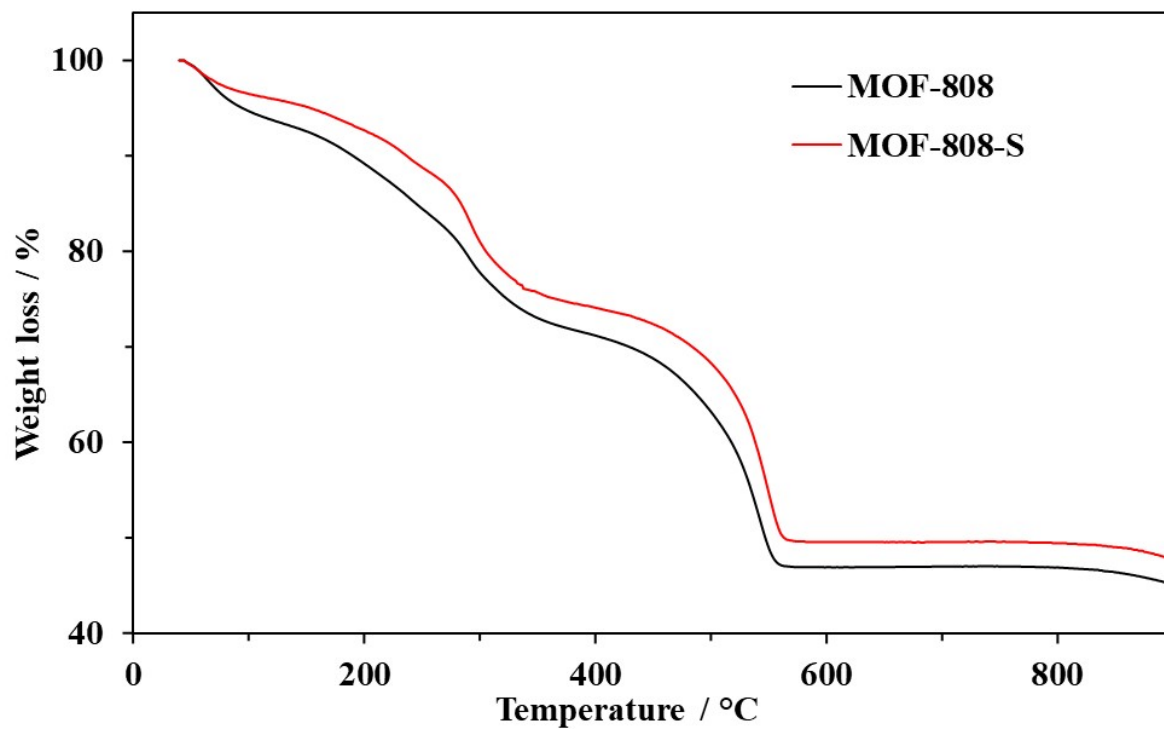

**Figure S3.** TGA profiles of MOF-808 and MOF-808-S.

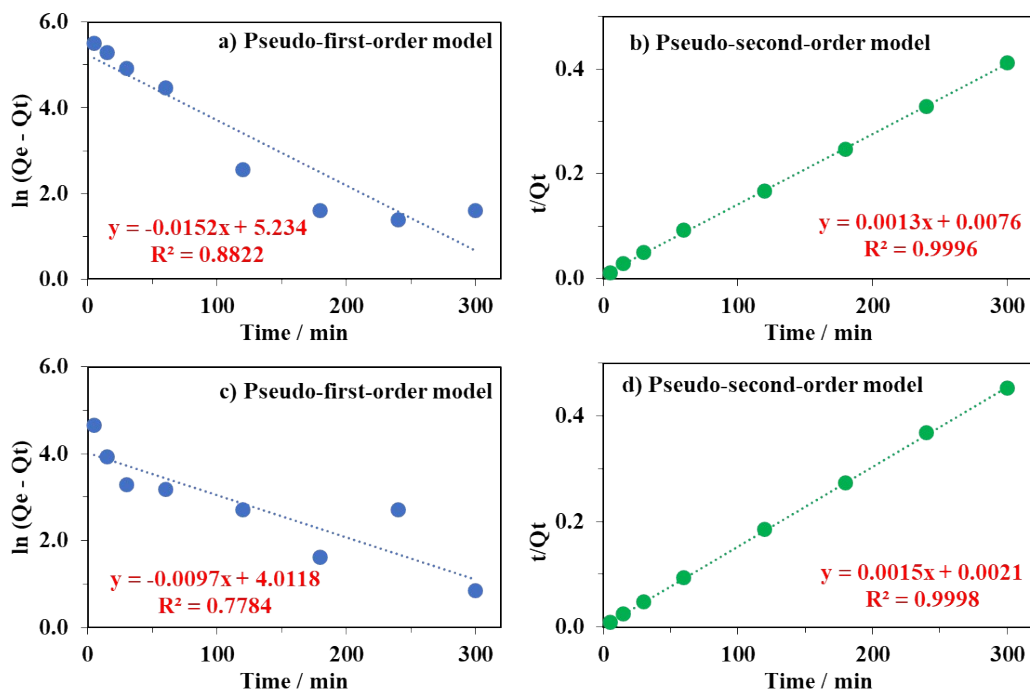

**Figure S4.** Pseudo-first-order and second-order models of the adsorption processes of quinoline yellow (a, b); and sunset yellow (c, d) on MOF-808-S.

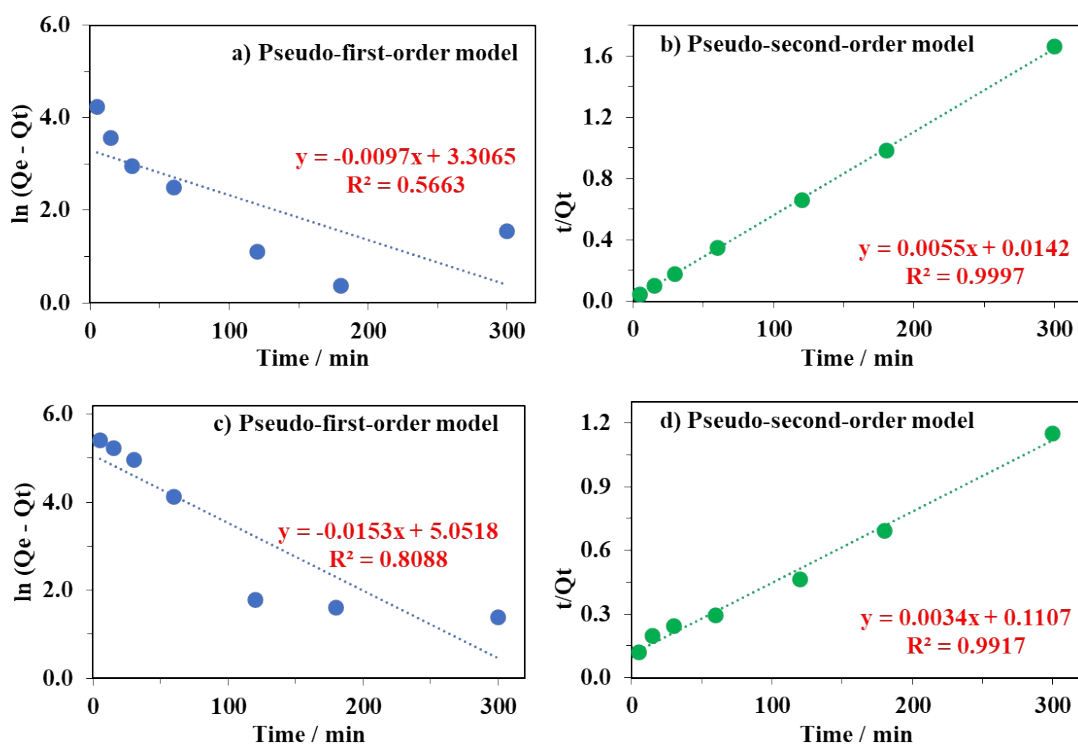

**Figure S5.** Pseudo-first-order and second-order models of the adsorption processes of rhodamine B (a, b), and malachite green (c, d) on MOF-808-S.

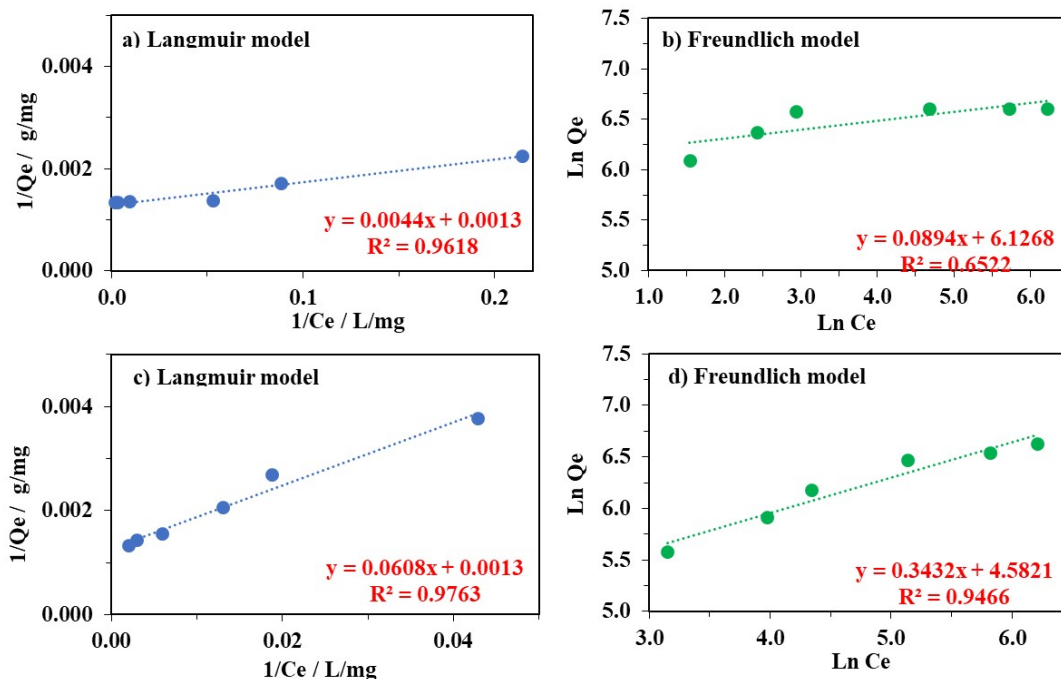

**Figure S6.** Langmuir and Freundlich models of the adsorption processes of quinoline yellow (a, b); and sunset yellow (c, d) on MOF-808-S.

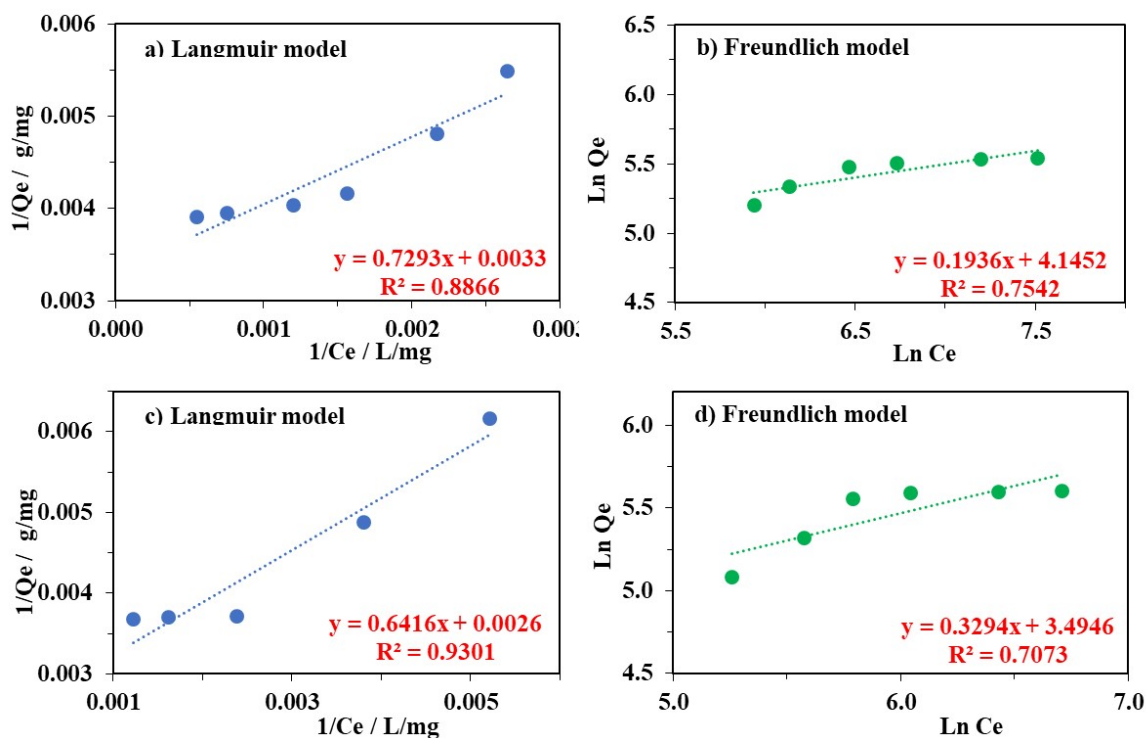

**Figure S7.** Langmuir and Freundlich models of the adsorption processes of rhodamine B (a, b), and malachite green (c, d) on MOF-808-S.

**Table S2.** Coefficients of pseudo first-order and second-order model for the adsorption process based on MOF-808-S.

| N. | Sample     | Pseudo-first-order model |                                        |                    | Pseudo-second-order model |                              |                    |
|----|------------|--------------------------|----------------------------------------|--------------------|---------------------------|------------------------------|--------------------|
|    |            | $Q_{e,cal}$ (mg/g)       | $k \cdot 10^{-2}$ (min <sup>-1</sup> ) | R <sup>2</sup> (%) | $Q_{e,cal}$ (mg/g)        | $k \cdot 10^{-2}$ (g/mg.min) | R <sup>2</sup> (%) |
| 1  | <b>QY</b>  | 187.5                    | -1.520                                 | 88.20              | 746.5                     | 0.023                        | 99.96              |
| 2  | <b>SY</b>  | 55.3                     | -0.966                                 | 77.84              | 661.4                     | 0.108                        | 99.98              |
| 3  | <b>RhB</b> | 27.3                     | -0.970                                 | 56.63              | 183.2                     | 0.210                        | 99.97              |
| 4  | <b>MG</b>  | 156.3                    | -1.530                                 | 80.88              | 298.1                     | 0.010                        | 99.18              |

**Table S3.** Coefficients of Langmuir and Freundlich models for adsorption processes based on MOF-808-S.

| N. | Sample     | Langmuir model |              |                    | Freundlich model |             |                    |
|----|------------|----------------|--------------|--------------------|------------------|-------------|--------------------|
|    |            | $K_L$ (L/mg)   | $Q_L$ (mg/g) | R <sup>2</sup> (%) | N                | $K_F$ (L/g) | R <sup>2</sup> (%) |
| 1  | <b>QY</b>  | 0.297          | 770.1        | 96.18              | 11.2             | 458.0       | 65.22              |
| 2  | <b>SY</b>  | 0.021          | 784.6        | 97.63              | 2.91             | 99.7        | 94.66              |
| 3  | <b>RhB</b> | 0.005          | 301.2        | 88.66              | 5.17             | 63.1        | 75.42              |
| 4  | <b>MG</b>  | 0.004          | 383.1        | 93.01              | 2.84             | 27.8        | 83.05              |

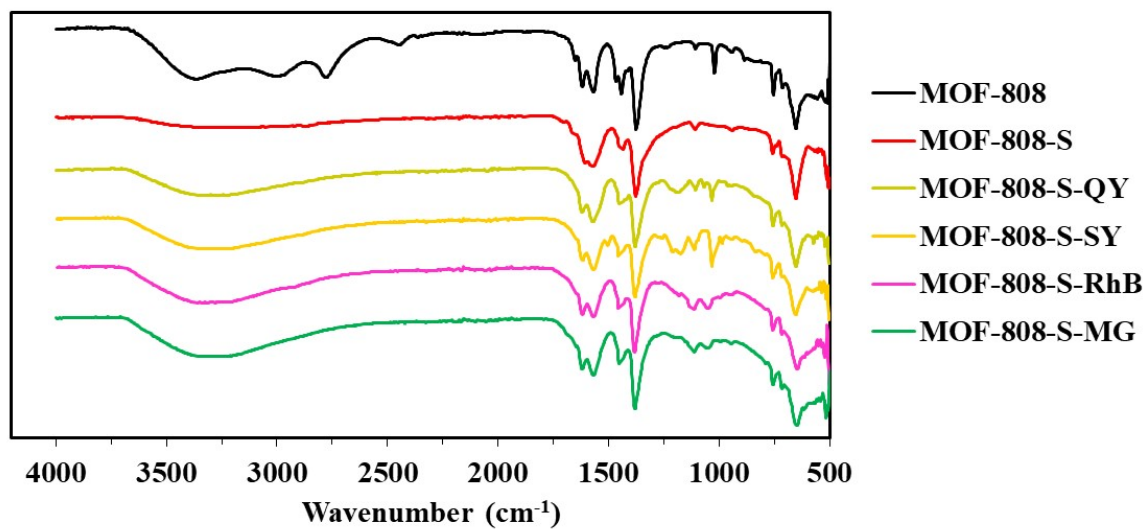

**Figure S8.** FT-IR spectra of the fresh and recovered materials.

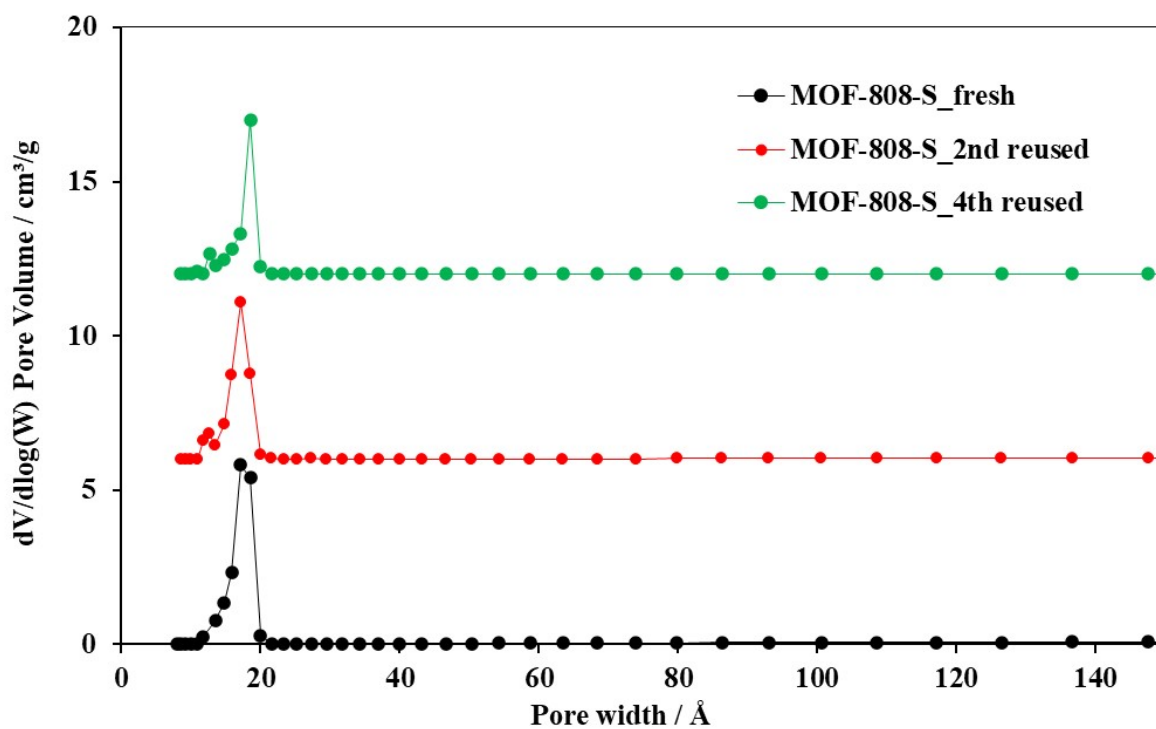

**Figure S9.** Pore size distribution of the fresh and reused MOF-808-S.



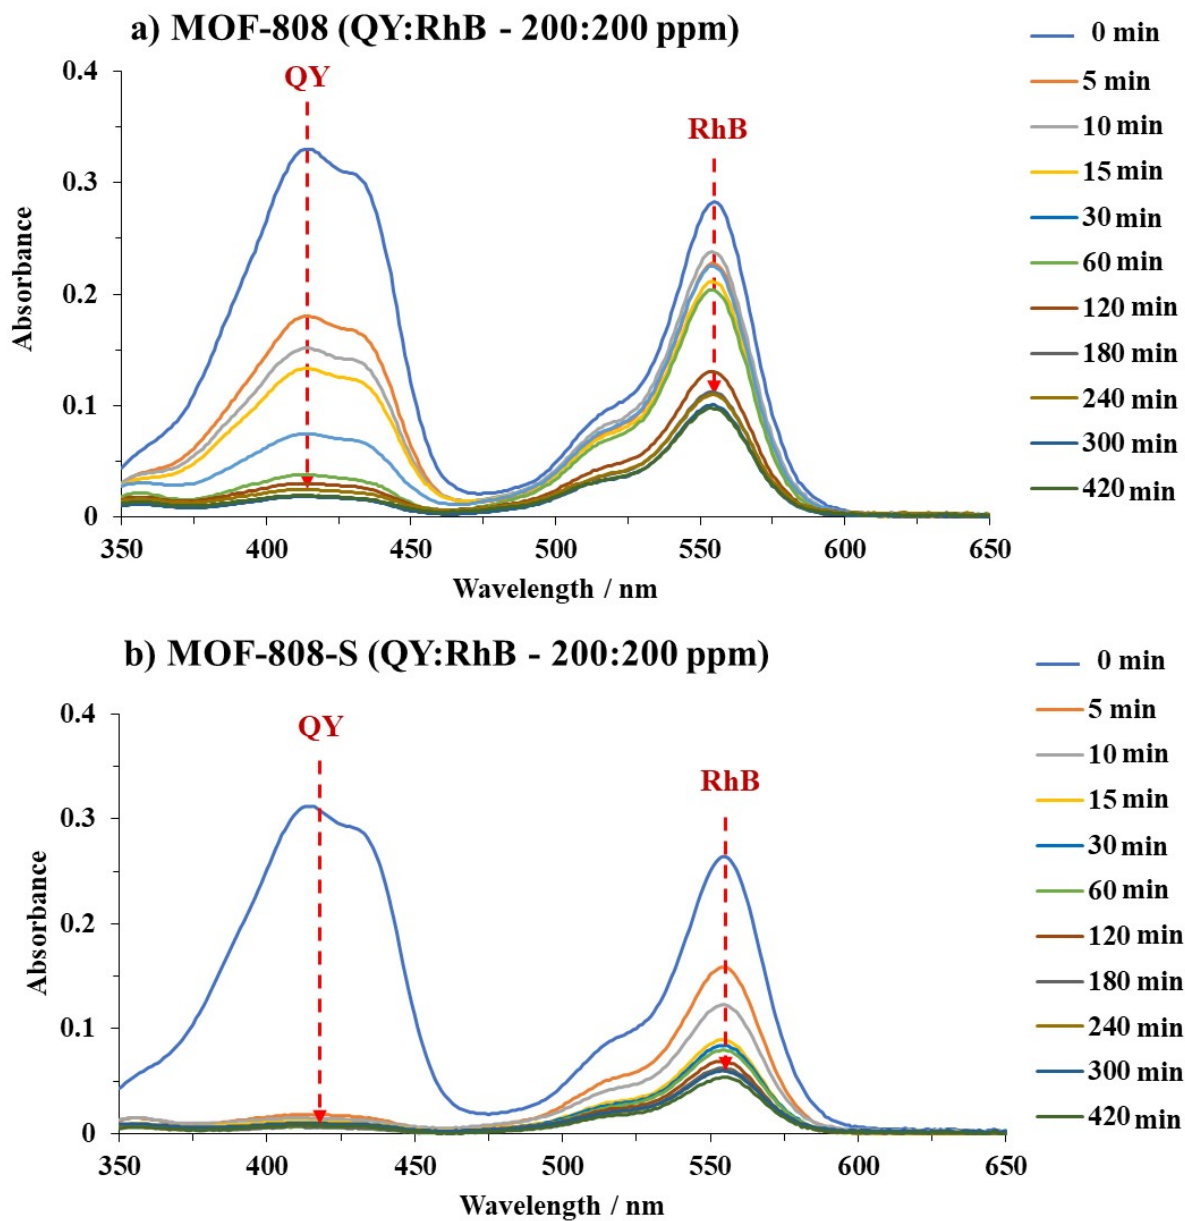

**Figure S10.** UV-Vis spectra of quinoline yellow-rhodamine B mixtures in the presence of 200 ppm for each dye at various time intervals employing MOF-808 and MOF-808-S as adsorbents
